# Supplementary material
Source: Research Square preprint supplement (doi:10.21203/rs.3.rs-9134321/v1)
Supplement: Supplementary file 1 [file 39f543f5325d87658e8c3333.docx]

Table 1S Sentinel 2 satellite parameters.

| **Band number** | **1** | **2** | **3** | **4** | **5** | **6** | **7** | **8** | **8a** | **9** | **10** | **11** | **12** |
| --- | --- | --- | --- | --- | --- | --- | --- | --- | --- | --- | --- | --- | --- |
| Band name | Coastal aerosol | Blue | Green | Red | Red Edge1 | Red Edge2 | Red Edge3 | NIR | Vegetation Red Edge | Water vapour | Cirrus | SWIR1 | SWIR2 |
| Central Wavelength(um) | 0.443 | 0.490 | 0.560 | 0.665 | 0.705 | 0.740 | 0.783 | 0.842 | 0.865 | 0.945 | 1.374 | 1.610 | 2.190 |
| Resolution(m) | 10 | 10 | 10 | 10 | 20 | 20 | 20 | 10 | 20 | 60 | 60 | 20 | 20 |
